# Supplementary material
Source: ML conference proceedings conference paper supplement (https://proceedings.mlr.press/v48/zhangb16.html)
Supplement: Supplementary file 1 [file zhangb16-supp.pdf]

---

# Supplementary Material: Online Stochastic Linear Optimization under One-bit Feedback

---

**Lijun Zhang**

ZHANGLJ@LAMDA.NJU.EDU.CN

National Key Laboratory for Novel Software Technology, Nanjing University, Nanjing 210023, China

**Tianbao Yang**

TIANBAO-YANG@UIOWA.EDU

Department of Computer Science, The University of Iowa, Iowa City, IA 52242, USA

**Rong Jin**

JINRONG.JR@ALIBABA-INC.COM

Alibaba Group, Seattle, USA

**Yichi Xiao**

XIAOYC@LAMDA.NJU.EDU.CN

**Zhi-Hua Zhou**

ZHOUZH@LAMDA.NJU.EDU.CN

National Key Laboratory for Novel Software Technology, Nanjing University, Nanjing 210023, China

## A. More Strategies for Efficient Implementations

**Enlarging the Confidence region** For a positive definite matrix  $A \in \mathbb{R}^{d \times d}$ , we define

$$\|\mathbf{x}\|_{1,A} = \|A^{1/2}\mathbf{x}\|_1.$$

When studying SLB, Dani et al. (2008) propose to enlarge the confidence region from  $\mathcal{C}_{t+1} = \{\mathbf{w} : \|\mathbf{w} - \mathbf{w}_{t+1}\|_{Z_{t+1}} \leq \sqrt{\gamma_{t+1}}\}$  to  $\tilde{\mathcal{C}}_{t+1} = \{\mathbf{w} : \|\mathbf{w} - \mathbf{w}_{t+1}\|_{1,Z_{t+1}} \leq \sqrt{d\gamma_{t+1}}\}$  such that the computational cost could be reduced. This idea can be direct incorporated to our OL<sup>2</sup>M. Let  $\mathcal{E}_{t+1}$  be the set of extremal points of  $\tilde{\mathcal{C}}_{t+1}$ . With this modification, (11) becomes

$$(\mathbf{x}_{t+1}, \hat{\mathbf{w}}_{t+1}) = \underset{\mathbf{x} \in \mathcal{D}, \mathbf{w} \in \tilde{\mathcal{C}}_{t+1}}{\operatorname{argmax}} \mathbf{x}^\top \mathbf{w} = \underset{\mathbf{x} \in \mathcal{D}, \mathbf{w} \in \mathcal{E}_{t+1}}{\operatorname{argmax}} \mathbf{x}^\top \mathbf{w}$$

which means we just need to enumerate over the  $2d$  vertices in  $\mathcal{E}_{t+1}$ . Following the arguments in Dani et al. (2008), it is straightforward to show that the regret is only increased by a factor of  $\sqrt{d}$ .

**Lazy Updating** Abbasi-yadkori et al. (2011) propose a lazy updating strategy which only needs to solve (11)  $O(\log T)$  times. The key idea is to recompute  $\mathbf{x}_t$  whenever  $\det(Z_t)$  increases by a constant factor  $(1+c)$ . While the computation cost is saved dramatically, the regret is only increased by a constant factor  $\sqrt{1+c}$ . We provide the lazy updating version of OL<sup>2</sup>M in Algorithm 2.

## B. Proof of Lemma 1

Let  $\mu(x) = \frac{\exp(x)}{1+\exp(x)}$ . It is easy to verify that  $\forall x \in [-R, R]$ ,

$$\frac{1}{2(1+\exp(R))} \leq \mu'(x) = \frac{\exp(x)}{(1+\exp(x))^2} \leq \frac{1}{4} \quad (23)$$

Note that for any  $-R \leq a \leq b \leq R$ , we have

$$\mu(b) = \mu(a) + \int_a^b \mu'(x) dx \quad (24)$$

**Algorithm 2** OL<sup>2</sup>M with Lazy Updating

---

```

1: Input: Regularization Parameter  $\lambda$ , Constant  $c$ 
2:  $Z_1 = \lambda I$ ,  $\mathbf{w}_1 = 0$ ,  $\tau = 1$ 
3: for  $t = 1, 2, \dots$  do
4:   if  $\det(Z_t) > (1 + c) \det(Z_\tau)$  then
5:      $(\mathbf{x}_t, \hat{\mathbf{w}}_t) = \operatorname{argmax}_{\mathbf{x} \in \mathcal{D}, \mathbf{w} \in \mathcal{C}_t} \mathbf{x}^\top \mathbf{w}$ 
6:      $\tau = t$ 
7:   end if
8:    $\mathbf{x}_t = \mathbf{x}_\tau$ 
9:   Submit  $\mathbf{x}_t$  and observe  $y_t \in \{\pm 1\}$ 
10:  Solve the optimization problem in (8) to find  $\mathbf{w}_{t+1}$ 
11: end for
    
```

---

Combining (23) with (24), we have

$$\frac{1}{2(1 + \exp(R))} (b - a) \leq \mu(b) - \mu(a) \leq \frac{1}{4} (b - a)$$

Let

$$\mathbf{x}_* = \operatorname{argmax}_{\mathbf{x} \in \mathcal{D}} \mathbf{x}^\top \mathbf{w}_* = \operatorname{argmax}_{\mathbf{x} \in \mathcal{D}} \frac{\exp(\mathbf{x}^\top \mathbf{w}_*)}{1 + \exp(\mathbf{x}^\top \mathbf{w}_*)}$$

Since  $-R \leq \mathbf{x}_t^\top \mathbf{w}_* \leq \mathbf{x}_*^\top \mathbf{w}_* \leq R$ , we have

$$\frac{1}{2(1 + \exp(R))} (\mathbf{x}_*^\top \mathbf{w}_* - \mathbf{x}_t^\top \mathbf{w}_*) \leq \frac{\exp(\mathbf{x}_*^\top \mathbf{w}_*)}{1 + \exp(\mathbf{x}_*^\top \mathbf{w}_*)} - \frac{\exp(\mathbf{x}_t^\top \mathbf{w}_*)}{1 + \exp(\mathbf{x}_t^\top \mathbf{w}_*)} \leq \frac{1}{4} (\mathbf{x}_*^\top \mathbf{w}_* - \mathbf{x}_t^\top \mathbf{w}_*)$$

which implies (7).

### C. Proof of Lemma 2

We first show that the one-dimensional logistic loss  $\ell(x) = \log(1 + \exp(-x))$  is  $\frac{1}{2(1 + \exp(R))}$ -strongly convex over domain  $[-R, R]$ . It is easy to verify that  $\forall x \in [-R, R]$ ,

$$\ell''(x) = \frac{\exp(x)}{(1 + \exp(x))^2} \geq \frac{1}{2(1 + \exp(R))}$$

implying the strong convexity of  $\ell(\cdot)$ . From the property of strongly convex, for any  $a, b \in [-R, R]$  we have

$$\ell(b) \geq \ell(a) + \ell'(a)(b - a) + \frac{\beta}{2}(b - a)^2. \quad (25)$$

Notice that for any  $\mathbf{w}_1, \mathbf{w}_2 \in \mathcal{B}_R$ , we have

$$y_t \mathbf{x}_t^\top \mathbf{w}_1, y_t \mathbf{x}_t^\top \mathbf{w}_2 \in [-R, R],$$

since  $y_t \in \{\pm 1\}$  and  $\|\mathbf{x}_t\|_2 \leq 1$ . Substituting  $a = y_t \mathbf{x}_t^\top \mathbf{w}_1$  and  $b = y_t \mathbf{x}_t^\top \mathbf{w}_2$  into (25), we have

$$\ell(y_t \mathbf{x}_t^\top \mathbf{w}_2) \geq \ell(y_t \mathbf{x}_t^\top \mathbf{w}_1) + \frac{\beta}{2} (y_t \mathbf{x}_t^\top \mathbf{w}_2 - y_t \mathbf{x}_t^\top \mathbf{w}_1)^2 + \ell'(y_t \mathbf{x}_t^\top \mathbf{w}_1) (y_t \mathbf{x}_t^\top \mathbf{w}_2 - y_t \mathbf{x}_t^\top \mathbf{w}_1).$$

We complete the proof by noticing

$$f_t(\mathbf{w}_1) = \ell(y_t \mathbf{x}_t^\top \mathbf{w}_1), f_t(\mathbf{w}_2) = \ell(y_t \mathbf{x}_t^\top \mathbf{w}_2), \text{ and } \nabla f_t(\mathbf{w}_1) = \ell'(y_t \mathbf{x}_t^\top \mathbf{w}_1) y_t \mathbf{x}_t.$$

## D. Proof of Lemma 3

Lemma 3 follows from a more general result stated below.

**Lemma 7.** *Let  $M$  be a positive definite matrix, and*

$$\mathbf{y} = \arg \min_{\mathbf{w} \in \mathcal{W}} \langle \mathbf{w}, \mathbf{g} \rangle + \frac{1}{2} \|\mathbf{w} - \mathbf{x}\|_M^2,$$

where  $\mathcal{W}$  is a convex set. Then for all  $\mathbf{w} \in \mathcal{W}$ , we have

$$\langle \mathbf{x} - \mathbf{w}, \mathbf{g} \rangle \leq \frac{\|\mathbf{x} - \mathbf{w}\|_M^2 - \|\mathbf{y} - \mathbf{w}\|_M^2}{2} + \frac{1}{2} \|\mathbf{g}\|_{M^{-1}}^2.$$

*Proof.* Since  $\mathbf{y}$  is the optimal solution to the optimization problem, from the first-order optimality condition (Boyd & Vandenberghe, 2004), we have

$$\langle \mathbf{g} + M(\mathbf{y} - \mathbf{x}), \mathbf{w} - \mathbf{y} \rangle \geq 0, \quad \forall \mathbf{w} \in \mathcal{W}. \quad (26)$$

Based on the above inequality, we have

$$\begin{aligned} & \|\mathbf{x} - \mathbf{w}\|_M^2 - \|\mathbf{y} - \mathbf{w}\|_M^2 \\ &= \mathbf{x}^\top M \mathbf{x} - \mathbf{y}^\top M \mathbf{y} + 2\langle M(\mathbf{y} - \mathbf{x}), \mathbf{w} \rangle \\ &\stackrel{(26)}{\geq} \mathbf{x}^\top M \mathbf{x} - \mathbf{y}^\top M \mathbf{y} + 2\langle M(\mathbf{y} - \mathbf{x}), \mathbf{y} \rangle - 2\langle \mathbf{g}, \mathbf{w} - \mathbf{y} \rangle \\ &= \|\mathbf{y} - \mathbf{x}\|_M^2 + 2\langle \mathbf{g}, \mathbf{y} - \mathbf{x} + \mathbf{x} - \mathbf{w} \rangle \\ &= 2\langle \mathbf{g}, \mathbf{x} - \mathbf{w} \rangle + \|\mathbf{y} - \mathbf{x}\|_M^2 + 2\langle \mathbf{g}, \mathbf{y} - \mathbf{x} \rangle \end{aligned}$$

Combining with the following inequality

$$\|\mathbf{y} - \mathbf{x}\|_M^2 + 2\langle \mathbf{g}, \mathbf{y} - \mathbf{x} \rangle \geq \min_{\mathbf{w}} \|\mathbf{w}\|_M^2 + 2\langle \mathbf{g}, \mathbf{w} \rangle = -\|\mathbf{g}\|_{M^{-1}}^2,$$

we have

$$\|\mathbf{x} - \mathbf{w}\|_M^2 - \|\mathbf{y} - \mathbf{w}\|_M^2 \geq 2\langle \mathbf{g}, \mathbf{x} - \mathbf{w} \rangle - \|\mathbf{g}\|_{M^{-1}}^2.$$

□

## E. Proof of Lemma 4

For each  $\mathbf{w} \in \mathbb{R}^d$ , we introduce a discrete probability distribution  $p_{\mathbf{w}}$  over  $\{\pm 1\}$  such that

$$p_{\mathbf{w}}(i) = \frac{1}{1 + \exp(-i\mathbf{x}_t^\top \mathbf{w})}, \quad i \in \{\pm 1\}.$$

Then, it is easy to verify that

$$\bar{f}_t(\mathbf{w}) = - \sum_{i \in \{\pm 1\}} p_{\mathbf{w}_*}(i) \log p_{\mathbf{w}}(i).$$

As a result

$$\begin{aligned} & \bar{f}_t(\mathbf{w}) - \bar{f}_t(\mathbf{w}_*) \\ &= \sum_{i \in \{\pm 1\}} p_{\mathbf{w}_*}(i) \log p_{\mathbf{w}_*}(i) - \sum_{i \in \{\pm 1\}} p_{\mathbf{w}_*}(i) \log p_{\mathbf{w}}(i) \\ &= \sum_{i \in \{\pm 1\}} p_{\mathbf{w}_*}(i) \log \frac{p_{\mathbf{w}_*}(i)}{p_{\mathbf{w}}(i)} = D_{KL}(p_{\mathbf{w}_*} \| p_{\mathbf{w}}) \geq 0 \end{aligned}$$

where  $D_{KL}(\cdot \| \cdot)$  is the Kullback–Leibler divergence between two distributions (Cover & Thomas, 2006).

## F. Proof of Lemma 5

We need the Bernstein's inequality for martingales (Cesa-Bianchi & Lugosi, 2006), which is provided in Appendix J. Form our definition of  $\bar{f}_i(\cdot)$  in (16), it is clear

$$b_i = [\nabla \bar{f}_i(\mathbf{w}_i) - \nabla f_i(\mathbf{w}_i)]^\top (\mathbf{w}_i - \mathbf{w}_*)$$

is a martingale difference sequence. Furthermore,

$$|b_i| \leq |[\nabla \bar{f}_i(\mathbf{w}_i)]^\top (\mathbf{w}_i - \mathbf{w}_*)| + |[\nabla f_i(\mathbf{w}_i)]^\top (\mathbf{w}_i - \mathbf{w}_*)| \leq 2|\mathbf{x}_i^\top (\mathbf{w}_i - \mathbf{w}_*)| \leq 2\|\mathbf{w}_i - \mathbf{w}_*\|_2 \leq 4R.$$

Define the martingale  $B_t = \sum_{i=1}^t b_i$ . Define the conditional variance  $\Sigma_t^2$  as

$$\begin{aligned} \Sigma_t^2 &= \sum_{i=1}^t \mathbb{E}_{y_i} \left[ \left( [\nabla \bar{f}_i(\mathbf{w}_i) - \nabla f_i(\mathbf{w}_i)]^\top (\mathbf{w}_i - \mathbf{w}_*) \right)^2 \right] \\ &\leq \sum_{i=1}^t \mathbb{E}_{y_i} \left[ \left( \nabla f_i(\mathbf{w}_i)^\top (\mathbf{w}_i - \mathbf{w}_*) \right)^2 \right] \leq \underbrace{\sum_{i=1}^t (\mathbf{x}_i^\top (\mathbf{w}_i - \mathbf{w}_*))^2}_{:=A_t}, \end{aligned}$$

where the first inequality is due to the fact that  $\mathbb{E}[(\xi - \mathbb{E}[\xi])^2] \leq \mathbb{E}[\xi^2]$  for any random variable  $\xi$ .

In the following, we consider two different scenarios, i.e.,  $A_t \leq \frac{4R^2}{t}$  and  $A_t > \frac{4R^2}{t}$ .

$A_t \leq \frac{4R^2}{t}$  In this case, we have

$$B_t \leq \sum_{i=1}^t |b_i| \leq 2 \sum_{i=1}^t |\mathbf{x}_i^\top (\mathbf{w}_i - \mathbf{w}_*)| \leq 2 \sqrt{t \sum_{i=1}^t (\mathbf{x}_i^\top (\mathbf{w}_i - \mathbf{w}_*))^2} \leq 4R. \quad (27)$$

$A_t > \frac{4R^2}{t}$  Since  $A_t$  in the upper bound for  $\Sigma_t^2$  is a random variable, we cannot apply Bernstein's inequality directly. To address this issue, we make use of the peeling process (Bartlett et al., 2005). Note that we have both a lower bound and an upper bound for  $A_t$ , i.e.,  $4R^2/t < A_t \leq 4R^2 t$ . Then,

$$\begin{aligned} &\Pr \left[ B_t \geq 2\sqrt{A_t \tau_t} + \frac{8}{3} R \tau_t \right] \\ &= \Pr \left[ B_t \geq 2\sqrt{A_t \tau_t} + \frac{8}{3} R \tau_t, \frac{4R^2}{t} < A_t \leq 4R^2 t \right] \\ &= \Pr \left[ B_t \geq 2\sqrt{A_t \tau_t} + \frac{8}{3} R \tau_t, \Sigma_t^2 \leq A_t, \frac{4R^2}{t} < A_t \leq 4R^2 t \right] \\ &\leq \sum_{i=1}^m \Pr \left[ B_t \geq 2\sqrt{A_t \tau_t} + \frac{8}{3} R \tau_t, \Sigma_t^2 \leq A_t, \frac{4R^2 2^{i-1}}{t} < A_t \leq \frac{4R^2 2^i}{t} \right] \\ &\leq \sum_{i=1}^m \Pr \left[ B_t \geq \sqrt{2 \frac{4R^2 2^i}{t}} \tau_t + \frac{8}{3} R \tau_t, \Sigma_t^2 \leq \frac{4R^2 2^i}{t} \right] \leq m e^{-\tau_t}, \end{aligned}$$

where  $m = \lceil 2 \log_2 t \rceil$ , and the last step follows the Bernstein's inequality for martingales. By setting  $\tau_t = \log \frac{2mt^2}{\delta}$ , with a probability at least  $1 - \delta/[2t^2]$ , we have

$$B_t \leq 2\sqrt{A_t \tau_t} + \frac{8}{3} R \tau_t. \quad (28)$$

Combining (27) and (28), with a probability at least  $1 - \delta/[2t^2]$ , we have

$$B_t \leq 4R + 2\sqrt{A_t \tau_t} + \frac{8}{3} R \tau_t.$$

We complete the proof by taking the union bound over  $t > 0$ , and using the well-known result

$$\sum_{t=1}^{\infty} \frac{1}{t^2} = \frac{\pi^2}{6} \leq 2.$$

## G. Proof of Lemma 6

We have

$$\|\mathbf{x}_i\|_{Z_{i+1}^{-1}}^2 = \frac{2}{\beta} \langle Z_{i+1}^{-1}, Z_{i+1} - Z_i \rangle \leq \frac{2}{\beta} \log \frac{\det(Z_{i+1})}{\det(Z_i)},$$

where the inequality follows from Lemma 12 in Hazan et al. (2007). Thus, we have

$$\sum_{i=1}^t \|\mathbf{x}_i\|_{Z_{i+1}^{-1}}^2 \leq \frac{2}{\beta} \sum_{i=1}^t \log \frac{\det(Z_{i+1})}{\det(Z_i)} = \frac{2}{\beta} \log \frac{\det(Z_{t+1})}{\det(Z_1)}.$$

## H. Proof of Corollary 2

Recall that

$$Z_{t+1} = Z_1 + \frac{\beta}{2} \sum_{i=1}^t \mathbf{x}_i \mathbf{x}_i^\top$$

and  $\|\mathbf{x}_t\|_2 \leq 1$  for all  $t > 0$ . From Lemma 10 of Abbasi-yadkori et al. (2011), we have

$$\det(Z_{t+1}) \leq \left( \lambda + \frac{\beta t}{2d} \right)^d.$$

Since  $\det(Z_1) = \lambda^d$ , we have

$$\log \frac{\det(Z_{t+1})}{\det(Z_1)} \leq d \log \left( 1 + \frac{\beta t}{2\lambda d} \right).$$

## I. Proof of Theorem 3

The proof is standard and can be found from Dani et al. (2008) and Abbasi-yadkori et al. (2011). We include it for the sake of completeness.

Let  $\mathbf{x}_* = \operatorname{argmax}_{\mathbf{x} \in \mathcal{D}} \mathbf{x}^\top \mathbf{w}_*$ . Recall that in each round, we have

$$(\mathbf{x}_t, \widehat{\mathbf{w}}_t) = \operatorname{argmax}_{\mathbf{x} \in \mathcal{D}, \mathbf{w} \in \mathcal{C}_t} \mathbf{x}^\top \mathbf{w}.$$

We decompose the instantaneous regret at round  $t$  as follows

$$\begin{aligned} & \mathbf{x}_*^\top \mathbf{w}_* - \mathbf{x}_t^\top \mathbf{w}_* \\ & \leq \mathbf{x}_t^\top \widehat{\mathbf{w}}_t - \mathbf{x}_t^\top \mathbf{w}_* = \mathbf{x}_t^\top (\widehat{\mathbf{w}}_t - \mathbf{w}_t) + \mathbf{x}_t^\top (\mathbf{w}_t - \mathbf{w}_*) \\ & \leq (\|\widehat{\mathbf{w}}_t - \mathbf{w}_t\|_{Z_t} + \|\mathbf{w}_t - \mathbf{w}_*\|_{Z_t}) \|\mathbf{x}_t\|_{Z_t^{-1}} \leq 2\sqrt{\gamma t} \|\mathbf{x}_t\|_{Z_t^{-1}}. \end{aligned}$$

On the other hand, we always have

$$\mathbf{x}_*^\top \mathbf{w}_* - \mathbf{x}_t^\top \mathbf{w}_* \leq \|\mathbf{x}_* - \mathbf{x}_t\|_2 \|\mathbf{w}_*\|_2 \leq 2R.$$

Thus, the total regret can be upper bounded by

$$\begin{aligned}
 & T \max_{\mathbf{x} \in \mathcal{D}} \mathbf{x}^\top \mathbf{w}_* - \sum_{t=1}^T \mathbf{x}_t^\top \mathbf{w}_* \\
 & \leq 2 \sum_{t=1}^T \min \left( \sqrt{\gamma_t} \|\mathbf{x}_t\|_{Z_t^{-1}}, R \right) \\
 & \leq 2 \sqrt{\gamma_T} \sum_{t=1}^T \min \left( \|\mathbf{x}_t\|_{Z_t^{-1}}, R \right) \\
 & = 2 \sqrt{\frac{2}{\beta}} \gamma_T \sum_{t=1}^T \min \left( \sqrt{\frac{\beta}{2}} \|\mathbf{x}_t\|_{Z_t^{-1}}, \sqrt{\frac{\beta}{2}} R \right) \\
 & \leq 2 \max \left( 1, \sqrt{\frac{\beta}{2}} R \right) \sqrt{\frac{2}{\beta}} \gamma_T \sum_{t=1}^T \min \left( \sqrt{\frac{\beta}{2}} \|\mathbf{x}_t\|_{Z_t^{-1}}, 1 \right) \\
 & \leq 2 \max \left( 1, \sqrt{\frac{\beta}{2}} R \right) \sqrt{\frac{2T}{\beta}} \gamma_T \sqrt{\sum_{t=1}^T \min \left( \frac{\beta}{2} \|\mathbf{x}_t\|_{Z_t^{-1}}^2, 1 \right)}.
 \end{aligned}$$

To proceed, we need the following results from Lemma 11 in [Abbasi-yadkori et al. \(2011\)](#),

$$\sum_{t=1}^T \min \left( \frac{\beta}{2} \|\mathbf{x}_t\|_{Z_t^{-1}}^2, 1 \right) \leq 2 \sum_{t=1}^T \log \left( 1 + \frac{\beta}{2} \|\mathbf{x}_t\|_{Z_t^{-1}}^2 \right)$$

and

$$\begin{aligned}
 \det(Z_{T+1}) &= \det \left( Z_T + \frac{\beta}{2} \mathbf{x}_T \mathbf{x}_T^\top \right) \\
 &= \det(Z_T) \det \left( I + \frac{\beta}{2} Z_T^{-1/2} \mathbf{x}_T \mathbf{x}_T^\top Z_T^{-1/2} \right) \\
 &= \det(Z_T) \left( 1 + \frac{\beta}{2} \|\mathbf{x}_T\|_{Z_T^{-1}}^2 \right) = \det(Z_1) \prod_{t=1}^T \left( 1 + \frac{\beta}{2} \|\mathbf{x}_t\|_{Z_t^{-1}}^2 \right).
 \end{aligned}$$

Combining the above inequations, we have

$$T \max_{\mathbf{x} \in \mathcal{D}} \mathbf{x}^\top \mathbf{w}_* - \sum_{t=1}^T \mathbf{x}_t^\top \mathbf{w}_* \leq 4 \max \left( 1, \sqrt{\frac{\beta}{2}} R \right) \sqrt{\frac{\gamma_T T}{\beta} \log \frac{\det(Z_{T+1})}{\det(Z_1)}}.$$

## J. Bernstein's Inequality for Martingales

**Theorem 4.** Let  $X_1, \dots, X_n$  be a bounded martingale difference sequence with respect to the filtration  $\mathcal{F} = (\mathcal{F}_i)_{1 \leq i \leq n}$  and with  $|X_i| \leq K$ . Let

$$S_i = \sum_{j=1}^i X_j$$

be the associated martingale. Denote the sum of the conditional variances by

$$\Sigma_n^2 = \sum_{t=1}^n \mathbb{E} [X_t^2 | \mathcal{F}_{t-1}].$$

Then for all constants  $t, \nu > 0$ ,

$$\Pr \left[ \max_{i=1, \dots, n} S_i > t \text{ and } \Sigma_n^2 \leq \nu \right] \leq \exp \left( -\frac{t^2}{2(\nu + Kt/3)} \right),$$

and therefore,

$$\Pr \left[ \max_{i=1, \dots, n} S_i > \sqrt{2\nu t} + \frac{2}{3} K t \text{ and } \Sigma_n^2 \leq \nu \right] \leq e^{-t}.$$

**K. Instantaneous regret of OL<sup>2</sup>M when  $\mathcal{D}$  is the unit ball in  $\mathbb{R}^{100}$**

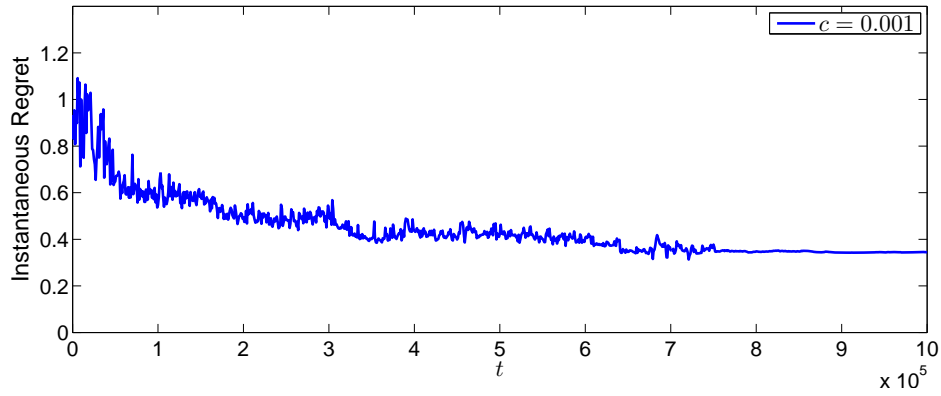

(a)  $c = 0.001$

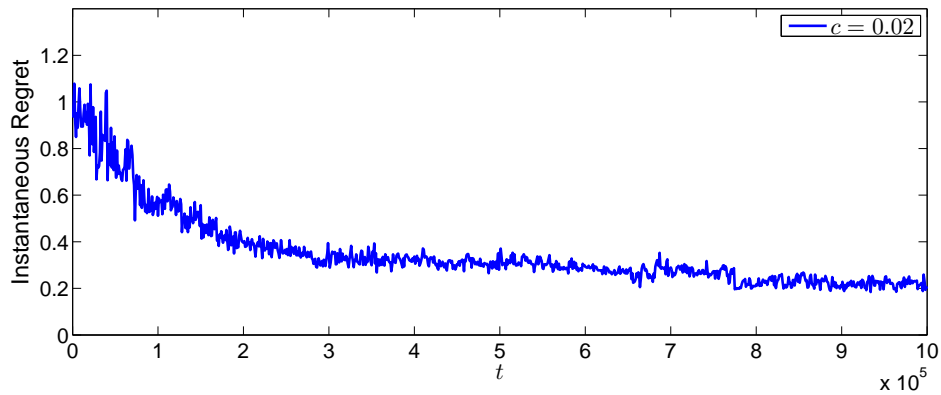

(b)  $c = 0.02$

Figure 4. Instantaneous regret of OL<sup>2</sup>M when  $\mathcal{D}$  is the unit ball in  $\mathbb{R}^{100}$ .

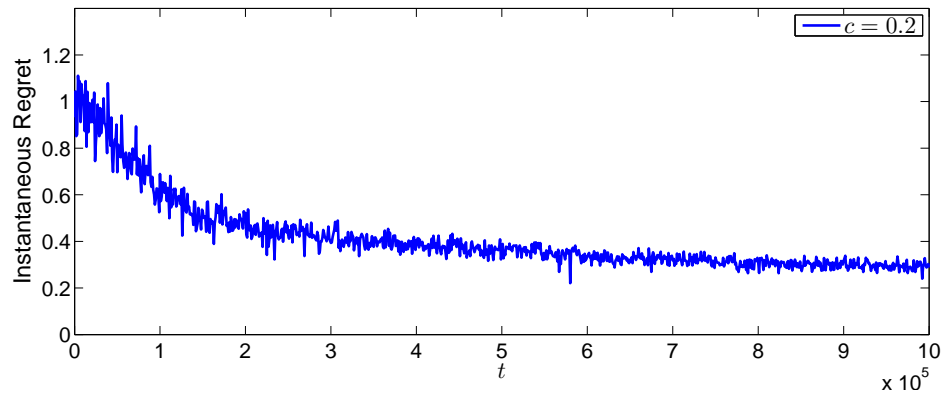

(a)  $c = 0.2$

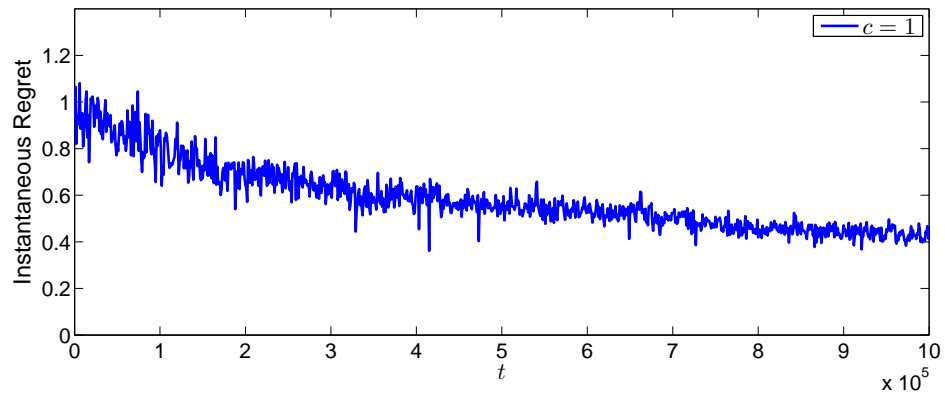

(b)  $c = 1$

Figure 5. Instantaneous regret of  $OL^2M$  when  $\mathcal{D}$  is the unit ball in  $\mathbb{R}^{100}$ .
